# Supplementary material
Source: PubMed Central journal article supplement (PMC7964491)
Supplement: 3322_table.pdf [file 3322_table.pdf]

**On-line Table: List of patients included in the study with intracranial aneurysms and flow-diverter devices: information, operative details, evaluation parameters, and calculated MAFA ratios**

| Patient         | Age (yr) | Location       | Dimensions (Diameters) | Neck      |             | FDS              | MAFA Ratio     | OKM Grade <sup>1B</sup> |      | Stagnation (sec) <sup>a</sup> |      | Follow-Up <sup>b</sup> |                 |
|-----------------|----------|----------------|------------------------|-----------|-------------|------------------|----------------|-------------------------|------|-------------------------------|------|------------------------|-----------------|
|                 |          |                |                        | Size (mm) | Volume (ml) |                  |                | Pre                     | Post | Pre                           | Post | Eclipse Sign           | Thrombosis Time |
| 1               | 68       | RICA cavernous | 14.3–12.4              | 5.80      | 2.9         | Silk 4–35        | 1.73125899     | A3                      | B3   | 6                             | 13   | 0                      | >12             |
| 2               | 60       | RCO            | 8.7–5.3                | 4.60      | 0.122       | Silk 4–25        | 0.87317215     | A1                      | B2   | 4                             | 5    | 0                      | <6              |
| 3               | 58       | LCO            | 6.2–4.7                | 3.80      | 0.124       | Silk 4–25        | 0.959098       | A1                      | A1   | 2                             | 4    | 0                      | <6              |
| 4               | 62       | LMCA           | 12.4–8.4               | 10.40     | 0.64        | Silk 3.5–35      | 0.80008918     | A2                      | A3   | 8                             | 13   | 1                      | <6              |
| 5               | 62       | RCO            | 6.6–5.6                | 3.90      | 0.115       | Silk 4–30        | 0.35638623     | A1                      | A3   | 3                             | 8    | 1                      | <12             |
| 6               | 50       | LCO            | 6.3–6.1                | 4.50      | 0.693       | Silk 4.5–30      | 0.46902199     | A1                      | A2   | 9                             | 9    | 0                      | <6              |
| 7               | 71       | LICA cavernous | 19.2–19.9              | 9.8       | 3.162       | Silk 4.5–30      | 0.9167982      | A3                      | B3   | 11                            | 13   | 1                      | <6              |
| 8               | 40       | RICA cavernous | 3.8–4                  | 4.70      | 0.082       | Silk 4.5–30      | 0.85186272     | A1                      | A2   | 6                             | 9    | 1                      | <6              |
| 9               | 66       | RICA cavernous | 22.4–23                | 6.00      | 6.716       | Silk 4.5–25      | 1.24752461     | A3                      | B3   | 13                            | 13   | 1                      | >12             |
| 10              | 74       | LV pica        | 5.2–4.9                | 4.10      | 0.083       | Silk 3–25        | 0.28077844     | A2                      | B3   | 13                            | 13   | 1                      | <6              |
| 11              | 53       | LCO            | 5.3–5.5                | 4.40      | 0.111       | Silk 4–30        | 1.15967975     | A1                      | A2   | 4                             | 6    | 0                      | >15             |
| 12 <sup>c</sup> | 49       | LCO            | 5.8–5.36               | 3.4       | 0.092       | Pipeline 4.25–20 | – <sup>c</sup> | A1                      | B2   | 4.5                           | 6    | 0                      | >12             |
| 13              | 56       | RICA           | 4.2–5.6                | 3.80      | 0.069       | Pipeline 4.25–18 | 0.7446334      | A1                      | A3   | 4.5                           | 6    | 0                      | <3              |
| 14              | 45       | LCO            | 7.7–6.7                | 3.80      | 0.173       | Silk 4.20        | 0.5148371      | A1                      | A2   | 4                             | 5.5  | 0                      | >12             |
| 15 <sup>c</sup> | 64       | CID            | 18.3–18.5              | 8.50      | 3.125       | Pipeline 3.5–20  | – <sup>c</sup> | A3                      | A3   | 11                            | 11   | 1                      | <3              |
| 16              | 65       | LCO            | 19.4–18.8              | 8.80      | 3.08        | Pipeline 4.5–18  | 0.99499876     | A3                      | B3   | 8                             | 13   | 1                      | <6              |
| 17              | 56       | LICA           | 3.4–3.2                | 2.90      | 0.026       | Pipeline 4.25–16 | 0.75739554     | A1                      | A1   | 2.5                           | 2.5  | 0                      | <3              |
| 18              | 56       | LCO            | 5.1–5.9                | 4.50      | 0.109       | Pipeline 4–14    | 0.49068804     | A1                      | A2   | 5.5                           | 6    | 1                      | <6              |
| 19              | 66       | LICA cavernous | 8.1–10.2               | 5.60      | 0.356       | Pipeline 4.5–20  | 1.25739497     | A2                      | A3   | 7                             | 13   | 1                      | <6              |
| 20 <sup>c</sup> | 60       | LICA l         | 4.28/4.4               | 3.7       | 0.044       | Pipeline 4–18    | – <sup>c</sup> | A2                      | A3   | 5                             | 6.5  | 0                      | <6              |
| 21              | 63       | LICA           | 2.5–2.6                | 2.70      | 0.023       | Pipeline 4–20    | 1.55735922     | A1                      | A1   | 3                             | 4    | 0                      | <6              |
| 22              | 49       | RICA hyp       | 3.2–3.9                | 3.50      | 0.03        | Pipeline 4–18    | 0.7326419      | A1                      | A1   | 4                             | 4    | 0                      | <3              |
| 23              | 35       | RCO            | 12.3–8.9               | 8.60      | 0.459       | Pipeline 4.75–20 | 0.68840899     | A2                      | A2   | 6                             | 5.5  | 0                      | <3              |
| 24              | 52       | LCO            | 9.6–8.5                | 4.60      | 0.353       | Pipeline 4–20    | 1.02506874     | A2                      | A3   | 4                             | 8    | 1                      | <3              |

**Note:**—RICA indicates right internal carotid artery (ICA); RCO, right ICA ophthalmic segment; LMCA, left middle cerebral artery; LICA, left ICA; LV, left vertebral; Pre, pre-operative; Post, post-operative; hyp, ICA hypophyseal segment; OKM, O'Kelly Marotta scale.

<sup>a</sup> Calculated by the first arrival of the contrast inside the aneurysm until complete washout after a maximum 13 seconds.

<sup>b</sup> “<” means complete thrombosis of the aneurysm; “>,” incomplete thrombosis; and the number represents the maximum follow-up observed.

<sup>c</sup> For patients 12, 15 and 20, the MAFA ratio calculation could not be achieved.
